# Supplementary material for: Antimicrobial Resistance Profiles of Enterococcus faecium and Enterococcus faecalis Isolated from Healthy Dogs and Cats in South Korea
Source: MDPI journal article supplement (doi:10.3390/microorganisms11122991), 2023-12-15
Supplement: s1 [file s1]

Table S1. *Enterococcus faecium* and *Enterococcus faecalis* isolates recovered from healthy dogs and cats during 2020–2022 in South Korea.

| Year  | <i>E. faecium</i>       |                 |                         |                 | <i>E. faecalis</i>      |                 |                         |                 |
|-------|-------------------------|-----------------|-------------------------|-----------------|-------------------------|-----------------|-------------------------|-----------------|
|       | Dogs                    |                 | Cats                    |                 | Dogs                    |                 | Cats                    |                 |
|       | No. of animal hospitals | No. of isolates | No. of animal hospitals | No. of isolates | No. of animal hospitals | No. of isolates | No. of animal hospitals | No. of isolates |
| 2020  | 20                      | 83              | 11                      | 18              | 27                      | 175             | 13                      | 41              |
| 2021  | 21                      | 77              | 10                      | 14              | 26                      | 124             | 14                      | 39              |
| 2022  | 24                      | 138             | 9                       | 22              | 25                      | 149             | 13                      | 45              |
| Total | 65                      | 298             | 30                      | 54              | 78                      | 448             | 40                      | 125             |

Table S2. *Enterococcus faecium* and *Enterococcus faecalis* isolates collection cities in South Korea.

| Bacterial species  | No. of isolates (%) |           |            |          |           |          |          |            | Total |
|--------------------|---------------------|-----------|------------|----------|-----------|----------|----------|------------|-------|
|                    | Seoul               | Gyeonggi  | Busan      | Daegu    | Incheon   | Gwangju  | Daejeon  | Ulsan      |       |
| <i>E. faecium</i>  | 95 (16.6)           | 33 (5.8)  | 180 (31.4) | 19 (3.3) | 38 (6.6)  | 21 (3.7) | 56 (9.8) | 131 (22.9) | 573   |
| <i>E. faecalis</i> | 48 (13.6)           | 36 (10.2) | 86 (24.4)  | 7 (2.0)  | 37 (10.5) | 17 (4.8) | 30 (8.5) | 91 (25.9)  | 352   |
| Total              | 143 (15.5)          | 69 (7.5)  | 266 (28.8) | 26 (2.8) | 75 (8.1)  | 38 (4.1) | 86 (9.3) | 222 (24.0) | 925   |

Table S3. The MIC<sub>50</sub> and MIC<sub>90</sub> of the tested antimicrobials against *E. faecium* (n = 298) isolated from healthy dogs during 2020–2022 in South Korea.

| Antimicrobials                 | 2020<br>(n = 83) | 2021<br>(n = 77) | 2022<br>(n = 138) | Total<br>(n = 298) |
|--------------------------------|------------------|------------------|-------------------|--------------------|
| <b>Ampicillin</b>              |                  |                  |                   |                    |
| MIC <sub>50</sub>              | 1                | 1                | 1                 | 1                  |
| MIC <sub>90</sub>              | 2                | 16               | 16                | 16                 |
| % Resistance (No. of isolates) | 4.8 (4)          | 24.7 (19)        | 21.7 (30)         | 19.8 (71)          |
| <b>Chloramphenicol</b>         |                  |                  |                   |                    |
| MIC <sub>50</sub>              | 4                | 4                | 4                 | 4                  |
| MIC <sub>90</sub>              | 8                | 8                | 4                 | 8                  |
| % Resistance (No. of isolates) | 0 (0)            | 5.2 (4)          | 2.2 (3)           | 4.2 (15)           |
| <b>Ciprofloxacin</b>           |                  |                  |                   |                    |
| MIC <sub>50</sub>              | 2                | 4                | 2                 | 2                  |
| MIC <sub>90</sub>              | 8                | 16               | 8                 | 16                 |
| % Resistance (No. of isolates) | 42.2 (35)        | 55.8 (43)        | 32.6 (45)         | 44.3 (159)         |
| <b>Daptomycin</b>              |                  |                  |                   |                    |
| MIC <sub>50</sub>              | 4                | 4                | 4                 | 4                  |
| MIC <sub>90</sub>              | 4                | 4                | 4                 | 4                  |
| % Resistance (No. of isolates) | 2.4 (2)          | 3.9 (3)          | 0 (0)             | 2.2 (8)            |
| <b>Erythromycin</b>            |                  |                  |                   |                    |
| MIC <sub>50</sub>              | 4                | 4                | 4                 | 4                  |
| MIC <sub>90</sub>              | 8                | 64               | 64                | 64                 |
| % Resistance (No. of isolates) | 28.9 (24)        | 46.8 (36)        | 43.5 (60)         | 42.6 (153)         |
| <b>Florfenicol</b>             |                  |                  |                   |                    |
| MIC <sub>50</sub>              | 2                | 4                | 2                 | 2                  |
| MIC <sub>90</sub>              | 4                | 4                | 2                 | 4                  |
| % Resistance (No. of isolates) | 0 (0)            | 1.3 (1)          | 2.2 (3)           | 2.2 (8)            |

|                                |           |           |           |            |
|--------------------------------|-----------|-----------|-----------|------------|
| Gentamicin                     |           |           |           |            |
| MIC <sub>50</sub>              | 128       | 128       | 128       | 128        |
| MIC <sub>90</sub>              | 128       | 2048      | 128       | 128        |
| % Resistance (No. of isolates) | 2.4 (2)   | 13 (10)   | 7.2 (10)  | 8.1 (29)   |
| Kanamycin                      |           |           |           |            |
| MIC <sub>50</sub>              | 128       | 128       | 128       | 128        |
| MIC <sub>90</sub>              | 256       | 2048      | 2048      | 2048       |
| % Resistance (No. of isolates) | 7.2 (6)   | 18.2 (14) | 11.6 (16) | 15.3 (55)  |
| Linezolid                      |           |           |           |            |
| MIC <sub>50</sub>              | 2         | 2         | 1         | 2          |
| MIC <sub>90</sub>              | 2         | 2         | 2         | 2          |
| % Resistance (No. of isolates) | 0 (0)     | 0 (0)     | 0 (0)     | 0 (0)      |
| Quinupristin/dalfopristin      |           |           |           |            |
| MIC <sub>50</sub>              | 2         | 2         | 2         | 2          |
| MIC <sub>90</sub>              | 2         | 4         | 2         | 2          |
| % Resistance (No. of isolates) | 2.4 (2)   | 15.6 (12) | 5.8 (8)   | 8.6 (31)   |
| Salinomycin                    |           |           |           |            |
| MIC <sub>50</sub>              | 2         | 2         | 2         | 2          |
| MIC <sub>90</sub>              | 2         | 2         | 2         | 2          |
| % Resistance (No. of isolates) | 0 (0)     | 0 (0)     | 0 (0)     | 0.6 (2)    |
| Streptomycin                   |           |           |           |            |
| MIC <sub>50</sub>              | 128       | 128       | 128       | 128        |
| MIC <sub>90</sub>              | 128       | 2048      | 2048      | 2048       |
| % Resistance (No. of isolates) | 6 (5)     | 19.5 (15) | 18.1 (25) | 17 (61)    |
| Tetracycline                   |           |           |           |            |
| MIC <sub>50</sub>              | 2         | 16        | 2         | 2          |
| MIC <sub>90</sub>              | 128       | 128       | 128       | 128        |
| % Resistance (No. of isolates) | 32.5 (27) | 50.6 (39) | 29 (40)   | 39.8 (143) |
| Tigecycline                    |           |           |           |            |
| MIC <sub>50</sub>              | 0.25      | 0.25      | 0.25      | 0.25       |
| MIC <sub>90</sub>              | 0.5       | 0.5       | 0.25      | 0.5        |
| % Resistance (No. of isolates) | 0 (0)     | 0 (0)     | 0 (0)     | 0 (0)      |
| Tylosin                        |           |           |           |            |
| MIC <sub>50</sub>              | 4         | 4         | 2         | 4          |
| MIC <sub>90</sub>              | 8         | 64        | 64        | 64         |
| % Resistance (No. of isolates) | 7.2 (6)   | 24.7 (19) | 13 (18)   | 17.5 (63)  |
| Vancomycin                     |           |           |           |            |
| MIC <sub>50</sub>              | 2         | 2         | 2         | 2          |
| MIC <sub>90</sub>              | 2         | 2         | 2         | 2          |
| % Resistance (No. of isolates) | 0 (0)     | 0 (0)     | 0 (0)     | 0 (0)      |

MIC<sub>50</sub> and MIC<sub>90</sub> are the concentrations (µg/mL) at which 50% and 90% of the isolates were inhibited, respectively.

Table S4. The MIC<sub>50</sub> and MIC<sub>90</sub> of the tested antimicrobials against *E. faecium* (n = 54) isolated from healthy cats during 2020–2022 in South Korea.

| Antimicrobials    | 2020<br>(n = 18) | 2021<br>(n = 14) | 2022<br>(n = 22) | Total<br>(n = 54) |
|-------------------|------------------|------------------|------------------|-------------------|
| Ampicillin        |                  |                  |                  |                   |
| MIC <sub>50</sub> | 1                | 1                | 2                | 1                 |
| MIC <sub>90</sub> | 2                | 16               | 16               | 16                |

|                                |          |           |           |           |
|--------------------------------|----------|-----------|-----------|-----------|
| % Resistance (No. of isolates) | 11.1 (2) | 21.4 (3)  | 13.6 (3)  | 23.1 (18) |
| Chloramphenicol                |          |           |           |           |
| MIC <sub>50</sub>              | 4        | 8         | 4         | 4         |
| MIC <sub>90</sub>              | 8        | 8         | 4         | 8         |
| % Resistance (No. of isolates) | 0 (0)    | 0 (0)     | 0 (0)     | 0 (0)     |
| Ciprofloxacin                  |          |           |           |           |
| MIC <sub>50</sub>              | 1        | 4         | 2         | 2         |
| MIC <sub>90</sub>              | 8        | 16        | 8         | 16        |
| % Resistance (No. of isolates) | 33.3 (6) | 71.4 (10) | 36.4 (8)  | 48.7 (38) |
| Daptomycin                     |          |           |           |           |
| MIC <sub>50</sub>              | 4        | 4         | 4         | 4         |
| MIC <sub>90</sub>              | 4        | 4         | 4         | 4         |
| % Resistance (No. of isolates) | 11.1 (2) | 0 (0)     | 0 (0)     | 5.1 (4)   |
| Erythromycin                   |          |           |           |           |
| MIC <sub>50</sub>              | 4        | 4         | 8         | 4         |
| MIC <sub>90</sub>              | 64       | 64        | 64        | 64        |
| % Resistance (No. of isolates) | 16.7 (3) | 28.6 (4)  | 54.5 (12) | 34.6 (27) |
| Florfenicol                    |          |           |           |           |
| MIC <sub>50</sub>              | 2        | 4         | 2         | 2         |
| MIC <sub>90</sub>              | 4        | 4         | 2         | 4         |
| % Resistance (No. of isolates) | 0 (0)    | 0 (0)     | 0 (0)     | 0 (0)     |
| Gentamicin                     |          |           |           |           |
| MIC <sub>50</sub>              | 128      | 128       | 128       | 128       |
| MIC <sub>90</sub>              | 128      | 2048      | 128       | 2048      |
| % Resistance (No. of isolates) | 5.6 (1)  | 14.3 (2)  | 9.1 (2)   | 14.1 (11) |
| Kanamycin                      |          |           |           |           |
| MIC <sub>50</sub>              | 128      | 128       | 128       | 128       |
| MIC <sub>90</sub>              | 2048     | 2048      | 256       | 2048      |
| % Resistance (No. of isolates) | 22.2 (4) | 21.4 (3)  | 9.1 (2)   | 20.5 (16) |
| Linezolid                      |          |           |           |           |
| MIC <sub>50</sub>              | 2        | 2         | 2         | 2         |
| MIC <sub>90</sub>              | 2        | 2         | 2         | 2         |
| % Resistance (No. of isolates) | 0 (0)    | 0 (0)     | 0 (0)     | 0 (0)     |
| Quinupristin/dalfopristin      |          |           |           |           |
| MIC <sub>50</sub>              | 2        | 2         | 2         | 2         |
| MIC <sub>90</sub>              | 2        | 2         | 4         | 2         |
| % Resistance (No. of isolates) | 11.1 (2) | 0 (0)     | 13.6 (3)  | 6.4 (5)   |
| Salinomycin                    |          |           |           |           |
| MIC <sub>50</sub>              | 2        | 2         | 2         | 2         |
| MIC <sub>90</sub>              | 2        | 2         | 2         | 2         |
| % Resistance (No. of isolates) | 0 (0)    | 0 (0)     | 0 (0)     | 0 (0)     |
| Streptomycin                   |          |           |           |           |
| MIC <sub>50</sub>              | 128      | 128       | 128       | 128       |
| MIC <sub>90</sub>              | 128      | 128       | 2048      | 2048      |
| % Resistance (No. of isolates) | 11.1 (2) | 7.1 (1)   | 13.6 (3)  | 15.4 (12) |
| Tetracycline                   |          |           |           |           |
| MIC <sub>50</sub>              | 2        | 16        | 2         | 2         |
| MIC <sub>90</sub>              | 128      | 128       | 64        | 128       |
| % Resistance (No. of isolates) | 27.8 (5) | 57.1 (8)  | 18.2 (4)  | 37.2 (29) |
| Tigecycline                    |          |           |           |           |

|                                |          |          |          |           |
|--------------------------------|----------|----------|----------|-----------|
| MIC <sub>50</sub>              | 0.25     | 0.25     | 0.25     | 0.25      |
| MIC <sub>90</sub>              | 0.25     | 0.5      | 0.25     | 0.5       |
| % Resistance (No. of isolates) | 0 (0)    | 0 (0)    | 0 (0)    | 0 (0)     |
| Tylosin                        |          |          |          |           |
| MIC <sub>50</sub>              | 4        | 4        | 4        | 4         |
| MIC <sub>90</sub>              | 64       | 64       | 64       | 64        |
| % Resistance (No. of isolates) | 16.7 (3) | 14.3 (2) | 13.6 (3) | 19.2 (15) |
| Vancomycin                     |          |          |          |           |
| MIC <sub>50</sub>              | 2        | 2        | 2        | 2         |
| MIC <sub>90</sub>              | 2        | 2        | 2        | 2         |
| % Resistance (No. of isolates) | 0 (0)    | 0 (0)    | 0 (0)    | 0 (0)     |

MIC<sub>50</sub> and MIC<sub>90</sub> are the concentrations (µg/mL) at which 50% and 90% of the isolates were inhibited, respectively.

Table S5. The MIC<sub>50</sub> and MIC<sub>90</sub> of the tested antimicrobials against *E. faecalis* (n = 448) isolated from healthy dogs during 2020–2022 in South Korea.

| Antimicrobials                 | 2020<br>(n = 175) | 2021<br>(n = 124) | 2022<br>(n = 149) | Total<br>(n = 448) |
|--------------------------------|-------------------|-------------------|-------------------|--------------------|
| Ampicillin                     |                   |                   |                   |                    |
| MIC <sub>50</sub>              | 1                 | 1                 | 1                 | 1                  |
| MIC <sub>90</sub>              | 1                 | 1                 | 1                 | 1                  |
| % Resistance (No. of isolates) | 0 (0)             | 0 (0)             | 0 (0)             | 0 (0)              |
| Chloramphenicol                |                   |                   |                   |                    |
| MIC <sub>50</sub>              | 8                 | 8                 | 4                 | 8                  |
| MIC <sub>90</sub>              | 32                | 32                | 32                | 32                 |
| % Resistance (No. of isolates) | 14.3 (25)         | 18.5 (23)         | 18.1 (27)         | 18.5 (104)         |
| Ciprofloxacin                  |                   |                   |                   |                    |
| MIC <sub>50</sub>              | 1                 | 1                 | 1                 | 1                  |
| MIC <sub>90</sub>              | 2                 | 2                 | 1                 | 2                  |
| % Resistance (No. of isolates) | 3.4 (6)           | 4 (5)             | 2 (3)             | 3.4 (19)           |
| Daptomycin                     |                   |                   |                   |                    |
| MIC <sub>50</sub>              | 1                 | 1                 | 1                 | 1                  |
| MIC <sub>90</sub>              | 2                 | 2                 | 2                 | 2                  |
| % Resistance (No. of isolates) | 0 (0)             | 0 (0)             | 0 (0)             | 0.4 (2)            |
| Erythromycin                   |                   |                   |                   |                    |
| MIC <sub>50</sub>              | 2                 | 2                 | 2                 | 2                  |
| MIC <sub>90</sub>              | 64                | 64                | 64                | 64                 |
| % Resistance (No. of isolates) | 40.6 (71)         | 37.9 (47)         | 39.6 (59)         | 42 (236)           |
| Florfenicol                    |                   |                   |                   |                    |
| MIC <sub>50</sub>              | 2                 | 2                 | 2                 | 2                  |
| MIC <sub>90</sub>              | 4                 | 4                 | 2                 | 4                  |
| % Resistance (No. of isolates) | 3.4 (6)           | 4.8 (6)           | 1.3 (2)           | 2.7 (15)           |
| Gentamicin                     |                   |                   |                   |                    |
| MIC <sub>50</sub>              | 128               | 128               | 128               | 128                |
| MIC <sub>90</sub>              | 2048              | 1024              | 2048              | 2048               |
| % Resistance (No. of isolates) | 18.9 (33)         | 12.9 (16)         | 20.8 (31)         | 19.2 (108)         |
| Kanamycin                      |                   |                   |                   |                    |
| MIC <sub>50</sub>              | 128               | 128               | 128               | 128                |
| MIC <sub>90</sub>              | 2048              | 2048              | 2048              | 2048               |
| % Resistance (No. of isolates) | 31.4 (55)         | 31.5 (39)         | 31.5 (47)         | 33.5 (188)         |

|                                |            |           |           |            |
|--------------------------------|------------|-----------|-----------|------------|
| Linezolid                      |            |           |           |            |
| MIC <sub>50</sub>              | 1          | 1         | 1         | 1          |
| MIC <sub>90</sub>              | 2          | 2         | 2         | 2          |
| % Resistance (No. of isolates) | 0 (0)      | 0 (0)     | 0 (0)     | 0 (0)      |
| Quinupristin/dalfopristin      |            |           |           |            |
| MIC <sub>50</sub>              | 8          | 8         | 8         | 8          |
| MIC <sub>90</sub>              | 8          | 8         | 8         | 8          |
| % Resistance (No. of isolates) | ND         | ND        | ND        | ND         |
| Salinomycin                    |            |           |           |            |
| MIC <sub>50</sub>              | 2          | 2         | 2         | 2          |
| MIC <sub>90</sub>              | 2          | 2         | 2         | 2          |
| % Resistance (No. of isolates) | 0 (0)      | 0 (0)     | 0 (0)     | 0 (0)      |
| Streptomycin                   |            |           |           |            |
| MIC <sub>50</sub>              | 128        | 128       | 128       | 128        |
| MIC <sub>90</sub>              | 2048       | 2048      | 2048      | 2048       |
| % Resistance (No. of isolates) | 19.4 (34)  | 18.5 (23) | 18.1 (27) | 20.5 (115) |
| Tetracycline                   |            |           |           |            |
| MIC <sub>50</sub>              | 32         | 64        | 32        | 64         |
| MIC <sub>90</sub>              | 128        | 128       | 128       | 128        |
| % Resistance (No. of isolates) | 62.9 (110) | 67.7 (84) | 65.8 (98) | 67.3 (378) |
| Tigecycline                    |            |           |           |            |
| MIC <sub>50</sub>              | 0.25       | 0.25      | 0.25      | 0.25       |
| MIC <sub>90</sub>              | 0.5        | 0.5       | 0.5       | 0.5        |
| % Resistance (No. of isolates) | 0 (0)      | 0 (0)     | 0 (0)     | 0 (0)      |
| Tylosin                        |            |           |           |            |
| MIC <sub>50</sub>              | 2          | 2         | 2         | 2          |
| MIC <sub>90</sub>              | 64         | 64        | 64        | 64         |
| % Resistance (No. of isolates) | 40.6 (71)  | 37.1 (46) | 40.3 (60) | 42 (236)   |
| Vancomycin                     |            |           |           |            |
| MIC <sub>50</sub>              | 2          | 2         | 2         | 2          |
| MIC <sub>90</sub>              | 2          | 2         | 2         | 2          |
| % Resistance (No. of isolates) | 0 (0)      | 0 (0)     | 0 (0)     | 0(0)       |

MIC<sub>50</sub> and MIC<sub>90</sub> are the concentrations (µg/mL) at which 50% and 90% of the isolates were inhibited, respectively.

Table S6. The MIC<sub>50</sub> and MIC<sub>90</sub> of the tested antimicrobials against *E. faecalis* (n =125) isolated from healthy cats during 2020–2022 in South Korea.

| Antimicrobials                 | 2020<br>(n = 41) | 2021<br>(n = 39) | 2022<br>(n = 45) | Total<br>(n = 125) |
|--------------------------------|------------------|------------------|------------------|--------------------|
| Ampicillin                     |                  |                  |                  |                    |
| MIC <sub>50</sub>              | 1                | 1                | 1                | 1                  |
| MIC <sub>90</sub>              | 1                | 1                | 1                | 1                  |
| % Resistance (No. of isolates) | 0 (0)            | 0 (0)            | 0 (0)            | 0 (0)              |
| Chloramphenicol                |                  |                  |                  |                    |
| MIC <sub>50</sub>              | 8                | 8                | 4                | 8                  |
| MIC <sub>90</sub>              | 32               | 32               | 32               | 32                 |
| % Resistance (No. of isolates) | 29.3 (12)        | 30.8 (12)        | 33.3 (15)        | 30.9 (46)          |
| Ciprofloxacin                  |                  |                  |                  |                    |
| MIC <sub>50</sub>              | 1                | 1                | 1                | 1                  |
| MIC <sub>90</sub>              | 2                | 2                | 2                | 2                  |

|                                |           |           |           |            |
|--------------------------------|-----------|-----------|-----------|------------|
| % Resistance (No. of isolates) | 7.3 (3)   | 5.1 (2)   | 4.4 (2)   | 6 (9)      |
| Daptomycin                     |           |           |           |            |
| MIC <sub>50</sub>              | 2         | 1         | 1         | 2          |
| MIC <sub>90</sub>              | 2         | 2         | 2         | 2          |
| % Resistance (No. of isolates) | 0 (0)     | 0 (0)     | 0 (0)     | 0 (0)      |
| Erythromycin                   |           |           |           |            |
| MIC <sub>50</sub>              | 2         | 4         | 64        | 4          |
| MIC <sub>90</sub>              | 64        | 64        | 64        | 64         |
| % Resistance (No. of isolates) | 46.3 (19) | 46.2 (18) | 55.6 (25) | 47.7 (71)  |
| Florfenicol                    |           |           |           |            |
| MIC <sub>50</sub>              | 2         | 2         | 2         | 2          |
| MIC <sub>90</sub>              | 4         | 4         | 16        | 4          |
| % Resistance (No. of isolates) | 4.9 (2)   | 7.7 (3)   | 11.1 (5)  | 7.4 (11)   |
| Gentamicin                     |           |           |           |            |
| MIC <sub>50</sub>              | 128       | 128       | 128       | 128        |
| MIC <sub>90</sub>              | 2048      | 1024      | 2048      | 2048       |
| % Resistance (No. of isolates) | 26.8 (11) | 20.5 (8)  | 35.6 (16) | 28.2 (42)  |
| Kanamycin                      |           |           |           |            |
| MIC <sub>50</sub>              | 128       | 128       | 128       | 128        |
| MIC <sub>90</sub>              | 2048      | 2048      | 2048      | 2048       |
| % Resistance (No. of isolates) | 39 (16)   | 28.2 (11) | 40 (18)   | 36.2 (54)  |
| Linezolid                      |           |           |           |            |
| MIC <sub>50</sub>              | 1         | 1         | 1         | 1          |
| MIC <sub>90</sub>              | 2         | 2         | 2         | 2          |
| % Resistance (No. of isolates) | 0 (0)     | 0 (0)     | 0 (0)     | 0 (0)      |
| Quinupristin/dalfopristin      |           |           |           |            |
| MIC <sub>50</sub>              | 8         | 8         | 8         | 8          |
| MIC <sub>90</sub>              | 8         | 16        | 16        | 8          |
| % Resistance (No. of isolates) | ND        | ND        | ND        | ND         |
| Salinomycin                    |           |           |           |            |
| MIC <sub>50</sub>              | 2         | 2         | 2         | 2          |
| MIC <sub>90</sub>              | 2         | 2         | 2         | 2          |
| % Resistance (No. of isolates) | 0 (0)     | 0 (0)     | 0 (0)     | 0 (0)      |
| Streptomycin                   |           |           |           |            |
| MIC <sub>50</sub>              | 128       | 128       | 128       | 128        |
| MIC <sub>90</sub>              | 2048      | 2048      | 2048      | 2048       |
| % Resistance (No. of isolates) | 19.5 (8)  | 17.9 (7)  | 33.3 (15) | 24.8 (37)  |
| Tetracycline                   |           |           |           |            |
| MIC <sub>50</sub>              | 64        | 64        | 64        | 64         |
| MIC <sub>90</sub>              | 64        | 64        | 128       | 128        |
| % Resistance (No. of isolates) | 80.5 (33) | 76.9 (30) | 68.9 (31) | 73.8 (110) |
| Tigecycline                    |           |           |           |            |
| MIC <sub>50</sub>              | 0.25      | 0.25      | 0.25      | 0.25       |
| MIC <sub>90</sub>              | 0.25      | 0.25      | 0.5       | 0.5        |
| % Resistance (No. of isolates) | 0 (0)     | 0 (0)     | 0 (0)     | 0 (0)      |
| Tylosin                        |           |           |           |            |
| MIC <sub>50</sub>              | 4         | 2         | 64        | 4          |
| MIC <sub>90</sub>              | 64        | 64        | 64        | 64         |
| % Resistance (No. of isolates) | 46.3 (19) | 43.6 (17) | 53.3 (24) | 47 (70)    |
| Vancomycin                     |           |           |           |            |
| MIC <sub>50</sub>              | 2         | 2         | 2         | 2          |

|                                |           |           |           |           |
|--------------------------------|-----------|-----------|-----------|-----------|
| MIC <sub>90</sub>              | 2         | 2         | 2         | 2         |
| % Resistance (No. of isolates) | 0 (0)     | 0 (0)     | 0 (0)     | 0 (0)     |
| MDR                            | 43.9 (18) | 43.6 (17) | 48.9 (22) | 46.3 (69) |

MIC<sub>50</sub> and MIC<sub>90</sub> are the concentrations (µg/mL) at which 50% and 90% of the isolates were inhibited, respectively.

Table S7. Antimicrobial resistance rate in *Enterococcus faecium* isolated from healthy dogs (n = 298) and cats (n = 54) during 2020–2022 in South Korea.

| Antimicrobials            | Resistance rate % (No. of isolates) |                  |                   |                       |         |                  |                  |                  |                      |         |
|---------------------------|-------------------------------------|------------------|-------------------|-----------------------|---------|------------------|------------------|------------------|----------------------|---------|
|                           | Dogs (n = 298)                      |                  |                   |                       |         | Cats (n = 54)    |                  |                  |                      |         |
|                           | 2020<br>(n = 83)                    | 2021<br>(n = 77) | 2022<br>(n = 138) | Subtotal<br>(n = 298) | p-value | 2020<br>(n = 18) | 2021<br>(n = 14) | 2022<br>(n = 22) | Subtotal<br>(n = 54) | p-value |
| Ampicillin                | 4.8 (4)*                            | 24.7(19)         | 21.7 (30)         | 17.8 (53)             | 0.0037  | 11.1 (2)         | 21.4 (3)         | 13.6 (3)         | 14.8 (8)             | 0.4358  |
| Chloramphenicol           | 0 (0)                               | 5.2(4)           | 2.2 (3)           | 2.3 (7)               | 0.1272  | 0 (0)            | 0 (0)            | 0 (0)            | 0 (0)                | ND      |
| Ciprofloxacin             | 42.2 (35)                           | 55.8(43)         | 32.6 (45)         | 41.3 (123)            | 0.8973  | 33.3 (6)         | 71.4 (10)        | 36.4 (8)         | 44.4 (24)            | 0.1073  |
| Daptomycin                | 2.4 (2)                             | 3.9(3)           | 0 (0)             | 1.7 (5)               | 0.7269  | 11.1 (2)*        | 0 (0)            | 0 (0)            | 3.7 (2)              | 0.0456  |
| Erythromycin              | 28.9 (24)                           | 46.8(36)         | 43.5 (60)         | 40.3 (120)            | 0.0902  | 16.7 (3)*        | 28.6 (4)         | 54.5 (12)*       | 35.2 (19)            | 0.0028  |
| Florfenicol               | 0 (0)                               | 1.3(1)           | 2.2 (3)           | 1.3 (4)               | 0.2527  | 0 (0)            | 0 (0)            | 0 (0)            | 0 (0)                | ND      |
| Gentamycin                | 2.4 (2)                             | 13(10)           | 7.2 (10)          | 7.4 (22)              | 0.1015  | 5.6 (1)          | 14.3 (2)         | 9.1 (2)          | 9.3 (5)              | 0.3191  |
| Kanamycin                 | 7.2 (6)                             | 18.2(14)         | 11.6 (16)         | 12. 1(36)             | 0.2406  | 22.2 (4)         | 21.4 (3)         | 9.1 (2)          | 16.7 (9)             | 0.3258  |
| Linezolid                 | 0 (0)                               | 0(0)             | 0 (0)             | 0 (0)                 | ND      | 0 (0)            | 0 (0)            | 0 (0)            | 0 (0)                | ND      |
| Quinupristin/dalfopristin | 2.4 (2)                             | 15.6(12)         | 5.8 (8)           | 7.4 (22)              | 0.1015  | 11.1 (2)         | 0 (0)            | 13.6 (3)         | 9.3 (5)              | 0.6741  |
| Salinomycin               | 0 (0)                               | 0(0)             | 0 (0)             | 0 (0)                 | ND      | 0 (0)            | 0 (0)            | 0 (0)            | 0 (0)                | ND      |
| Streptomycin              | 6 (5)*                              | 19.5(15)         | 18.1 (25)         | 15.1 (45)             | 0.0362  | 11.1 (2)         | 7.1 (1)          | 13.6 (3)         | 11.1 (6)             | 1       |
| Tetracycline              | 32.5 (27)                           | 50.6(39)         | 29 (40)           | 35.6 (106)            | 0.6437  | 27.8 (5)         | 57.1 (8)         | 18.2 (4)         | 31.5 (17)            | 0.5667  |
| Tigecycline               | 0 (0)                               | 0(0)             | 0 (0)             | 0 (0)                 | ND      | 0 (0)            | 0 (0)            | 0 (0)            | 0 (0)                | ND      |
| Tylosin tartrate          | 7.2 (6)                             | 24.7(19)         | 13 (18)           | 14.4 (43)             | 0.1009  | 16.7 (3)         | 14.3 (2)         | 13.6 (3)         | 14.8 (8)             | 0.7123  |
| Vancomycin                | 0 (0)                               | 0 (0)            | 0 (0)             | 0 (0)                 | ND      | 0 (0)            | 0 (0)            | 0 (0)            | 0 (0)                | ND      |

$p < 0.05$  was considered a significant change in antimicrobial resistance trend.



Table S8. Antimicrobial resistance rate in *Enterococcus faecalis* isolated from healthy dogs (n = 448) and cats (n = 125) during 2020–2022 in South Korea.

| Antimicrobials            | Resistance rate % (No. of isolates) |                   |                   |                       |         |                  |                  |                  |                       |         |
|---------------------------|-------------------------------------|-------------------|-------------------|-----------------------|---------|------------------|------------------|------------------|-----------------------|---------|
|                           | Dogs (n = 448)                      |                   |                   |                       |         | Cats (n = 125)   |                  |                  |                       |         |
|                           | 2020<br>(n = 175)                   | 2021<br>(n = 124) | 2022<br>(n = 149) | Subtotal<br>(n = 448) | p-value | 2020<br>(n = 41) | 2021<br>(n = 39) | 2022<br>(n = 45) | Subtotal<br>(n = 125) | p-value |
| Ampicillin                | 0 (0)                               | 0 (0)             | 0 (0)             | 0 (0)                 | ND      | 0 (0)            | 0 (0)            | 0 (0)            | 0 (0)                 | ND      |
| Chloramphenicol           | 14.3 (25)                           | 18.5 (23)         | 18.1 (27)         | 16.7 (75)             | 0.6391  | 29.3 (12)        | 30.8 (12)        | 33.3 (15)        | 31.2 (39)             | 0.7699  |
| Ciprofloxacin             | 3.4 (6)                             | 4 (5)             | 2 (3)             | 3.1 (14)              | 0.9048  | 7.3 (3)          | 5.1 (2)          | 4.4 (2)          | 5.6 (7)               | 0.6246  |
| Daptomycin                | 0 (0)                               | 0 (0)             | 0 (0)             | 0 (0)                 | ND      | 0 (0)            | 0 (0)            | 0 (0)            | 0 (0)                 | ND      |
| Erythromycin              | 40.6 (71)                           | 37.9 (47)         | 39.6 (59)         | 39.5 (177)            | 0.8739  | 46.3 (19)        | 46.2 (18)        | 55.6 (25)        | 49.6 (62)             | 0.6404  |
| Florfenicol               | 3.4 (6)                             | 4.8 (6)           | 1.3 (2)           | 3.1 (14)              | 0.9048  | 4.9 (2)          | 7.7 (3)          | 11.1 (5)         | 8 (10)                | 0.3722  |
| Gentamycin                | 18.9 (33)                           | 12.9 (16)         | 20.8 (31)         | 17.9 (80)             | 0.8552  | 26.8 (11)        | 20.5 (8)         | 35.6 (16)        | 28 (35)               | 0.8491  |
| Kanamycin                 | 31.4 (55)                           | 31.5 (39)         | 31.5 (47)         | 31.5 (141)            | 0.9878  | 39 (16)          | 28.2 (11)        | 40 (18)          | 36 (45)               | 0.6613  |
| Linezolid                 | 0 (0)                               | 0 (0)             | 0 (0)             | 0 (0)                 | ND      | 0 (0)            | 0 (0)            | 0 (0)            | 0 (0)                 | ND      |
| Quinupristin/dalfopristin | ND                                  | ND                | ND                | ND                    | ND      | ND               | ND               | ND               | ND                    | ND      |
| Salinomycin               | 0 (0)                               | 0 (0)             | 0 (0)             | 0 (0)                 | ND      | 0 (0)            | 0 (0)            | 0 (0)            | 0 (0)                 | ND      |
| Streptomycin              | 19.4 (34)                           | 18.5 (23)         | 18.1 (27)         | 18.8 (84)             | 0.9141  | 19.5 (8)         | 17.9 (7)         | 33.3 (15)        | 24 (30)               | 0.4405  |
| Tetracycline              | 62.9 (110)                          | 67.7 (84)         | 65.8 (98)         | 65.2 (292)            | 0.7347  | 80.5 (33)        | 76.9 (30)        | 68.9 (31)        | 75.2 (94)             | 0.3668  |
| Tigecycline               | 0 (0)                               | 0 (0)             | 0 (0)             | 0 (0)                 | ND      | 0 (0)            | 0 (0)            | 0 (0)            | 0 (0)                 | ND      |
| Tylosin tartrate          | 40.6 (71)                           | 37.1 (46)         | 40.3 (60)         | 39.5 (177)            | 0.8739  | 46.3 (19)        | 43.6 (17)        | 53.3 (24)        | 48 (60)               | 0.8097  |
| Vancomycin                | 0 (0)                               | 0 (0)             | 0 (0)             | 0 (0)                 | ND      | 0 (0)            | 0 (0)            | 0 (0)            | 0 (0)                 | ND      |

$p < 0.05$  was considered a significant change in antimicrobial resistance trend. ND, non-defined.

Table S9. Antimicrobial resistance patterns of *Enterococcus faecium* isolated from healthy dogs (n = 298) during 2020–2022 in South Korea.

| No. of antimicrobials<br>(No. of isolates) | Resistance patterns (No. of isolates)                                                                                                                                                              |
|--------------------------------------------|----------------------------------------------------------------------------------------------------------------------------------------------------------------------------------------------------|
| 0 (n=68)                                   | –                                                                                                                                                                                                  |
| 1 (n=114)                                  | AMP (n=3), CIP (n=32), ERY (n=61), SYN (n=6), TET (n=12)                                                                                                                                           |
| 2 (n=54)                                   | AMP CIP (n=2), AMP STR (n=4), AMP TET (n=1), CIP DAP (n=1), CIP ERY (n=6), CIP SYN (n=1), CIP TET (n=31), DAP ERY (n=1), DAP TET (n=1), ERY SYN (n=1), ERY TET (n=3), GEN KAN (n=1), STR TET (n=1) |
| 3 (n=13)                                   | AMP CIP STR (n=1), AMP CIP TET (n=3), AMP STR TET (n=3), CIP ERY TET (n=4), CIP KAN TET (n=1), ERY SYN TET (n=1)                                                                                   |
| 4 (n=9)                                    | AMP CHL FLR STR (n=1), AMP CIP KAN TET (n=1), AMP CIP STR TET (n=3), AMP ERY STR TYL (n=1), CIP ERY SYN TYL (n=1), CIP ERY TET TYL (n=1), GEN KAN STR TET (n=1)                                    |
| 5 (n=7)                                    | AMP CIP ERY TET TYL (n=2), CHL CIP ERY TET TYL (n=2), CIP ERY STR TET TYL (n=2), ERY KAN STR TET TYL (n=1)                                                                                         |
| 6 (n=8)                                    | AMP CIP ERY KAN TET TYL (n=2), AMP CIP ERY STR TET TYL (n=2), CIP ERY KAN STR TET TYL (n=3), ERY KAN SYN STR TET TYL (n=1)                                                                         |
| 7 (n=10)                                   | AMP CIP ERY GEN KAN TET TYL (n=2), AMP CIP ERY KAN STR TET TYL (n=4), AMP ERY GEN KAN STR TET TYL (n=3), CIP ERY KAN SYN STR TET TYL (n=1)                                                         |
| 8 (n=5)                                    | AMP CHL CIP ERY GEN KAN TET TYL (n=1), AMP CIP ERY FLR GEN KAN STR TYL (n=1), AMP CIP ERY GEN KAN SYN TET TYL (n=1), AMP CIP ERY GEN KAN STR TET TYL (n=2)                                         |
| 9 (n=7)                                    | AMP CHL CIP ERY GEN KAN STR TET TYL (n=2), AMP CIP ERY FLR GEN KAN STR TET TYL (n=1), AMP CIP ERY GEN KAN SYN STR TET TYL (n=4)                                                                    |
| 10 (n=2)                                   | AMP CIP DAP ERY GEN KAN SYN STR TET TYL (n=2)                                                                                                                                                      |
| 11 (n=1)                                   | AMP CHL CIP ERY FLR GEN KAN SYN STR TET TYL (n=1)                                                                                                                                                  |

AMP, ampicillin; CIP, ciprofloxacin; CHL, chloramphenicol; DAP, daptomycin; ERY, erythromycin; FLR, florfenicol; GEN, gentamicin; KAN, kanamycin; SYN, quinupristin/dalfopristin; STR, streptomycin; TET, tetracycline; TYL, tylosin.

Table S10. Antimicrobial resistance patterns of *Enterococcus faecium* isolated from healthy cats (n = 54) during 2020–2022 in South Korea.

| No. of antimicrobials<br>(No. of isolates) | Resistance patterns (No. of isolates)                                                       |
|--------------------------------------------|---------------------------------------------------------------------------------------------|
| 0 (n=15)                                   | –                                                                                           |
| 1 (n=19)                                   | CIP (n=7), DAP (n=2), ERY (n=6), KAN (n=1), TET (n=3)                                       |
| 2 (n=7)                                    | CIP ERY (n=2), CIP TET (n=4), ERY SYN (n=1)                                                 |
| 3 (n=3)                                    | AMP STR TET (n=1), CIP ERY SYN (n=1), CIP ERY TET (n=1)                                     |
| 4 (n=2)                                    | AMP CIP ERY TYL (n=1), AMP CIP GEN KAN (n=1)                                                |
| 5 (n=2)                                    | AMP CIP GEN KAN TET (n=1), CIP ERY KAN TET TYL (n=1)                                        |
| 6 (n=3)                                    | AMP CIP ERY STR TET TYL (n=1), CIP ERY KAN STR TET TYL (n=1), ERY GEN KAN STR TET TYL (n=1) |
| 7 (n=1)                                    | AMP CIP ERY KAN SYN TET TYL (n=1)                                                           |
| 8 (n=0)                                    | –                                                                                           |
| 9 (n=2)                                    | AMP CIP ERY GEN KAN SYN STR TET TYL (n=2)                                                   |
| 10 (n=0)                                   | –                                                                                           |

AMP, ampicillin; CIP, ciprofloxacin; DAP, daptomycin; ERY, erythromycin; GEN, gentamicin; KAN, kanamycin; SYN, quinupristin/dalfopristin; STR, streptomycin; TET, tetracycline; TYL, tylosin.

Table S11. Antimicrobial resistance patterns of *Enterococcus faecalis* isolated from healthy dogs (n = 448) during 2020–2022 in South Korea.

| No. of antimicrobials<br>(No of isolates) | Resistance patterns (No. of isolates)                                                                                                                                                                                                                    |
|-------------------------------------------|----------------------------------------------------------------------------------------------------------------------------------------------------------------------------------------------------------------------------------------------------------|
| 0 (n=147)                                 | –                                                                                                                                                                                                                                                        |
| 1 (n=101)                                 | KAN (n=1), TET (n=101)                                                                                                                                                                                                                                   |
| 2 (n=22)                                  | CHL TET (n=11), CIP TET (n=3), ERY TET (n=1), ERY TYL (n=4), FLR TET (n=1), KAN TET (n=1), STR TET (n=1)                                                                                                                                                 |
| 3 (n=25)                                  | CHL ERY TYL (n=1), ERY KAN TET (n=1), ERY TET TYL (n=20), GEN KAN TET (n=1), KAN STR TET (n=2)                                                                                                                                                           |
| 4 (n=31)                                  | CHL ERY KAN TYL (n=1), CHL ERY TET TYL (n=12), CHL GEN KAN STR (n=1), CHL STR TET TYL (n=1), CIP ERY TET TYL (n=1), ERY FLR TET TYL (n=1), ERY KAN TET TYL (n=13), ERY STR TET TYL (n=1)                                                                 |
| 5 (n=56)                                  | CHL ERY FLR TET TYL (n=1), CHL ERY KAN TET TYL (n=2), CHL ERY STR TET TYL (n=1), CHL KAN STR TET TYL (n=1), ERY GEN KAN TET TYL (n=24), ERY KAN STR TET TYL (n=27)                                                                                       |
| 6 (n=40)                                  | CHL ERY FLR KAN TET TYL (n=1), CHL ERY GEN KAN TET TYL (n=12), CHL ERY KAN STR TET TYL (n=5), CIP ERY FLR KAN TET TYL (n=1), CIP ERY GEN KAN TET TYL (n=1), CIP ERY KAN STR TET TYL (n=1), ERY FLR KAN STR TET TYL (n=1), ERY GEN KAN STR TET TYL (n=18) |
| 7 (n=20)                                  | CHL ERY FLR KAN STR TET TYL (n=3), CHL ERY GEN KAN STR TET TYL (n=16), CIP ERY GEN KAN STR TET TYL (n=1)                                                                                                                                                 |
| 8 (n=4)                                   | CHL CIP ERY FLR GEN KAN TET TYL (n=3), CHL CIP ERY GEN KAN STR TET TYL (n=1)                                                                                                                                                                             |
| 9 (n=2)                                   | CHL CIP ERY FLR GEN KAN STR TET TYL (n=2)                                                                                                                                                                                                                |

CIP, ciprofloxacin; CHL, chloramphenicol; ERY, erythromycin; FLR, florfenicol; GEN, gentamicin; KAN, kanamycin; STR, streptomycin; TET, tetracycline; TYL, tylosin.

Table S12. Antimicrobial resistance patterns of *Enterococcus faecalis* isolated from healthy cats (n = 125) during 2020–2022 in South Korea.

| No. of antimicrobials<br>(No. of isolates) | Resistance patterns (No. of isolates)                                                                                                                                                    |
|--------------------------------------------|------------------------------------------------------------------------------------------------------------------------------------------------------------------------------------------|
| 0 (n=26)                                   | –                                                                                                                                                                                        |
| 1 (n=33)                                   | CIP (n=1), ERY (n=1), TET (n=31)                                                                                                                                                         |
| 2 (n=3)                                    | CHL TET (n=1), CIP TET (n=1), ERY TET (n=1)                                                                                                                                              |
| 3 (n=8)                                    | CHL FLR TET (n=1), CHL STR TET (n=1), ERY TET TYL (n=6)                                                                                                                                  |
| 4 (n=11)                                   | CHL ERY TET TYL (n=8), CHL GEN KAN TET (n=1), ERY KAN TET TYL (n=2)                                                                                                                      |
| 5 (n=10)                                   | CHL ERY GEN KAN TYL (n=1), CHL ERY KAN TET TYL (n=1), ERY FLR STR TET TYL (n=1), ERY GEN KAN STR TYL (n=1), ERY GEN KAN TET TYL (n=3), ERY KAN STR TET TYL (n=3)                         |
| 6 (n=21)                                   | CHL CIP ERY FLR TET TYL (n=1), CHL ERY GEN KAN STR TYL (n=1), CHL ERY GEN KAN TET TYL (n=8), CHL ERY KAN STR TET TYL (n=2), CIP ERY KAN STR TET TYL (n=1), ERY GEN KAN STR TET TYL (n=8) |
| 7 (n=6)                                    | CHL ERY GEN KAN STR TET TYL (n=6)                                                                                                                                                        |
| 8 (n=6)                                    | CHL CIP ERY FLR GEN KAN TET TYL (n=1), CHL CIP ERY FLR KAN STR TET TYL (n=1), CHL ERY FLR GEN KAN STR TET TYL (n=4)                                                                      |
| 9 (n=1)                                    | CHL CIP ERY FLR GEN KAN STR TET TYL (n=1)                                                                                                                                                |

CIP, ciprofloxacin; CHL, chloramphenicol; ERY, erythromycin; FLR, florfenicol; GEN, gentamicin; KAN, kanamycin; STR, streptomycin; TET, tetracycline; TYL, tylosin.
